## Corrigendum

# Expanded functionality, increased accuracy, and enhanced speed in the *de novo* genotyping-by-sequencing pipeline GBS-SNP-CROP

Arthur T. O. Melo and Iago Hale 

*Bioinformatics* (2019) doi: 10.1093/bioinformatics/bty873, 35, 1783–1785.

In the original article, there was an error in the formatting of Table 1.

This has been corrected and the corrected table appears below.

**Table 1.** Comparative summary of GBS-SNP-CROP v.4.0 performance, based on a set of simulated data from GBS-Pacecar

| Pipeline <sup>a</sup> | MR geno <sup>b</sup> | Time (min) <sup>c</sup> | Variants called <sup>d</sup> | Type I error <sup>e</sup> | Type II error <sup>f</sup> | Accuracy <sup>g</sup> |
|-----------------------|----------------------|-------------------------|------------------------------|---------------------------|----------------------------|-----------------------|
| UNEAK                 | NA                   | 8.5                     | 2642                         | 0.9%                      | 92.5%                      | 7.5%                  |
| GSC v.1.0             | 1                    | 370.8                   | 23 395                       | 1.3%                      | 34.1%                      | 65.4%                 |
| GSC v.4.0             | 1                    | 121.7                   | 29 738                       | 0.6%                      | 15.6%                      | 84.0%                 |
|                       | 5                    | 156.9                   | 26 885                       | 0.6%                      | 23.6%                      | 76.0%                 |
|                       | 10                   | 171.5                   | 26 854                       | 0.5%                      | 23.7%                      | 76.1%                 |
|                       | 15                   | 179.1                   | 26 897                       | 0.5%                      | 23.6%                      | 76.1%                 |
|                       | 20                   | 183.0                   | 26 892                       | 0.5%                      | 23.6%                      | 76.1%                 |
|                       | 25                   | 163.2                   | 26 901                       | 0.5%                      | 23.5%                      | 76.2%                 |

*Note:* In total, 25 000 SNPs and 10 000 indels were simulated across a genomic space of 100 000 GBS fragments. A total of 60 002 165 single-end reads were simulated for a population of 25 individuals (average of 2.4 million reads per genotype), with a sequencing error rate of 1.1%. See [Supplementary Table S1](#) for more details

<sup>a</sup>UNEAK = TASSEL-UNEAK; GSC = GBS-SNP-CROP.

<sup>b</sup>The number of genotypes used for mock reference (MR) assembly.

<sup>c</sup>Computation time (minutes) required to run the full analysis on a Unix workstation with 16 GB RAM and a 2.6 GHz Dual Intel processor.

<sup>d</sup>Number of variants called by a pipeline (Note: a total of 35 000 variants were simulated, consisting of 25 000 SNPs and 10 000 indels).

<sup>e</sup>Percentage of called variants that could not be validated (false positives).

<sup>f</sup>Percentage of true, simulated variants that were not detected by the pipeline.

<sup>g</sup>Overall accuracy:  $100 * [\text{number of validated variants}/(\text{total number of simulated variants} + \text{number of non-validated variants})]$ .
